# Supplementary material for: Tuning the Reactivity of Perfluoropolyether-Functionalized Aluminum Nanoparticles by the Reaction Interface Fuel-Oxidizer Ratio
Source: MDPI journal article supplement (doi:10.3390/nano12030530), 2022-02-03
Supplement: s1 [file s1]

# Tuning the Reactivity of Perfluoropolyether-Functionalized Aluminum Nanoparticles by the Reaction Interface Fuel-Oxidizer Ratio

Chengcheng Wu <sup>1</sup>, Jianxin Nie <sup>1</sup>, Shengwei Li <sup>1</sup>, Wei Wang <sup>1,2</sup>, Qi Pan <sup>1</sup>, and Xueyong Guo <sup>1,\*</sup>

<sup>1</sup> State Key Laboratory of Explosion Science and Technology, Beijing Institute of Technology, Beijing 100081, China; 3120185179@bit.edu.cn (C.W.); niejx@bit.edu.cn (J.N.); 3120210240@bit.edu.cn (S.L.); 3220185029@bit.edu.cn (W.W.); panqi97@163.com (Q.P.)

<sup>2</sup> Beijing Institute of Space Long March Vehicle, China Academy of Launch Vehicle Technology, Beijing 100074, China

\* Correspondence: nust@bit.edu.cn

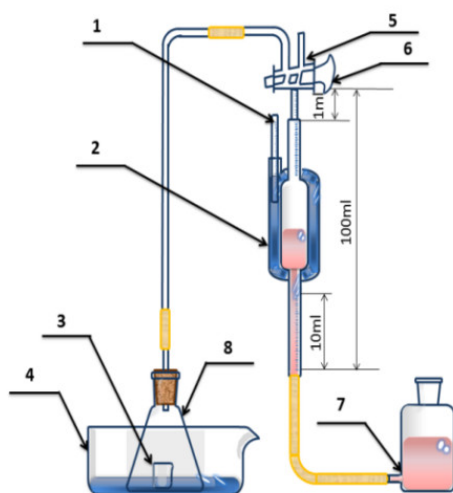

**Figure S1.** Testing device for the content of active aluminum: 1) thermometer; 2) eudiometer; 3) weighing bottle; 4) water tank; 5) gas vent; 6) piston; 7) level bottle; 8) conical flask.

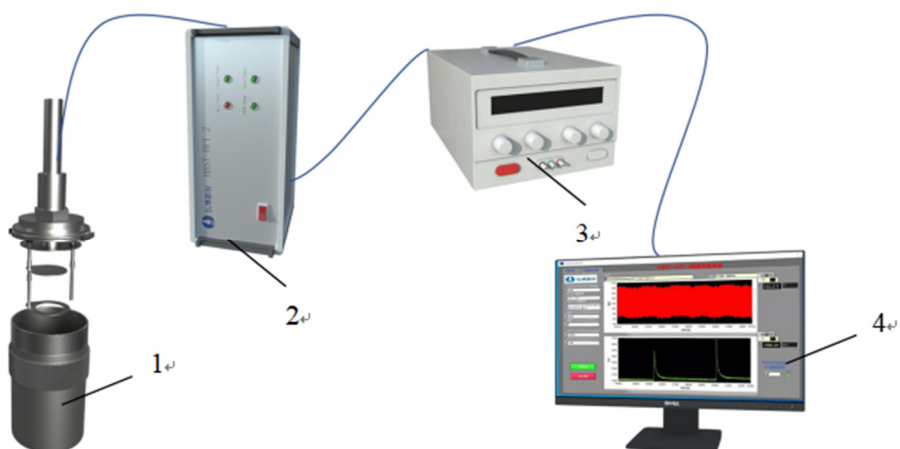

**Figure S2.** Schematic description of the constant volume combustion cell test: 1) constant volume combustion cell; 2) pressure testing device; 3) controlled DC current; 4) data acquisition unit.

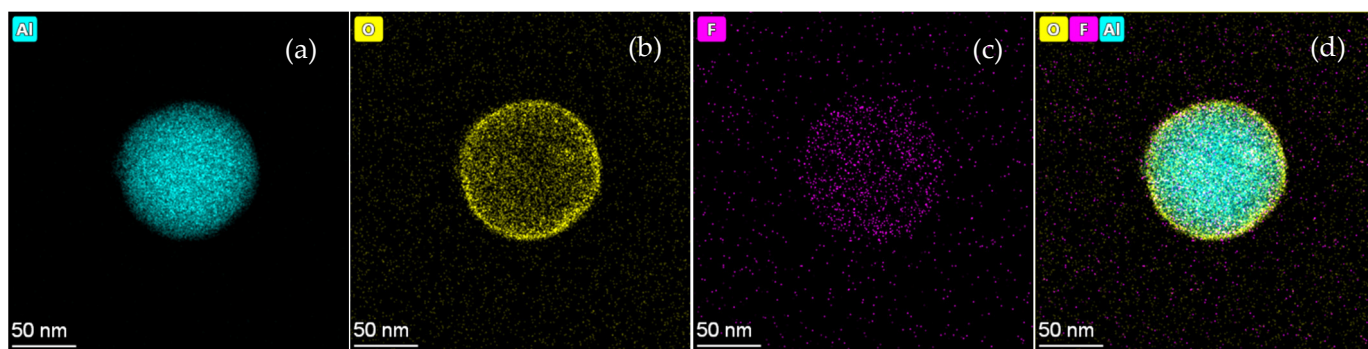

**Figure S3.** The elements distribution of individual nAl@5.0%PFPE particle: (a) Al element (green), (b) O element (yellow), (c) F element (purple), (d) above-mentioned elements.

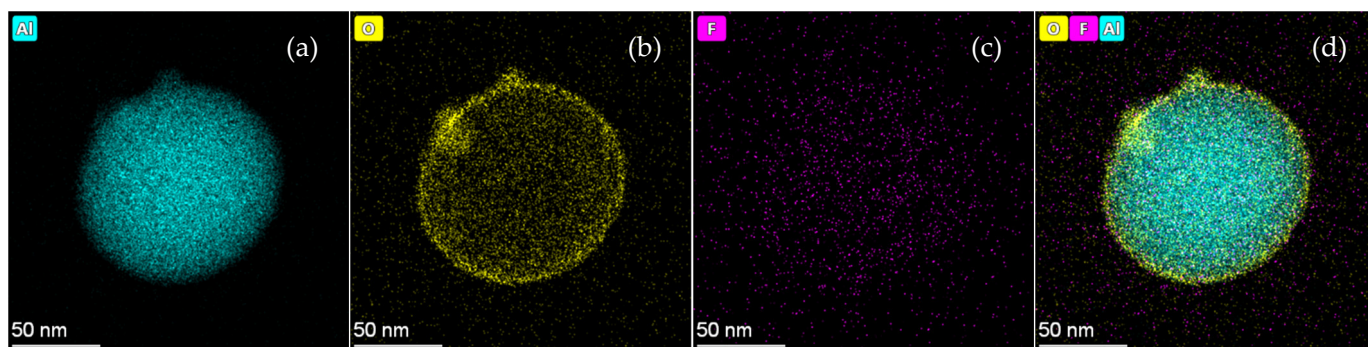

**Figure S4.** The elements distribution of individual nAl@5.0%PFPE particle: (a) Al element (green), (b) O element (yellow), (c) F element (purple), (d) above-mentioned elements.

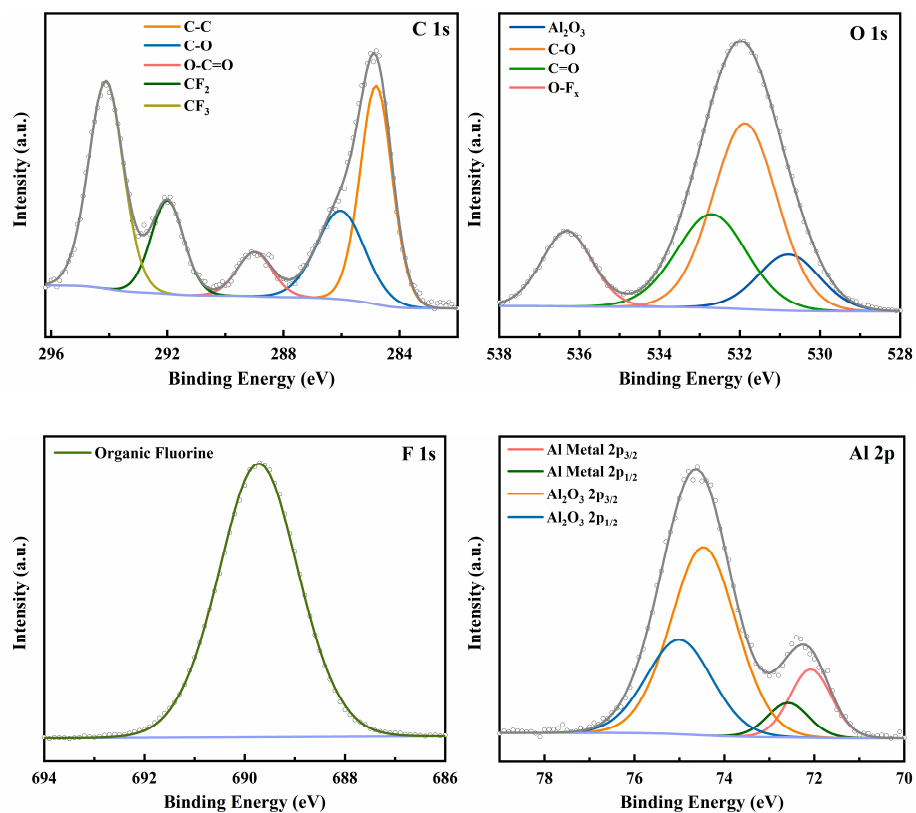

**Figure S5.** XPS spectra of C 1s peaks, O 1s peaks, O 1s peaks and Al 2p peaks for nAl@5.0%PFPE particles.

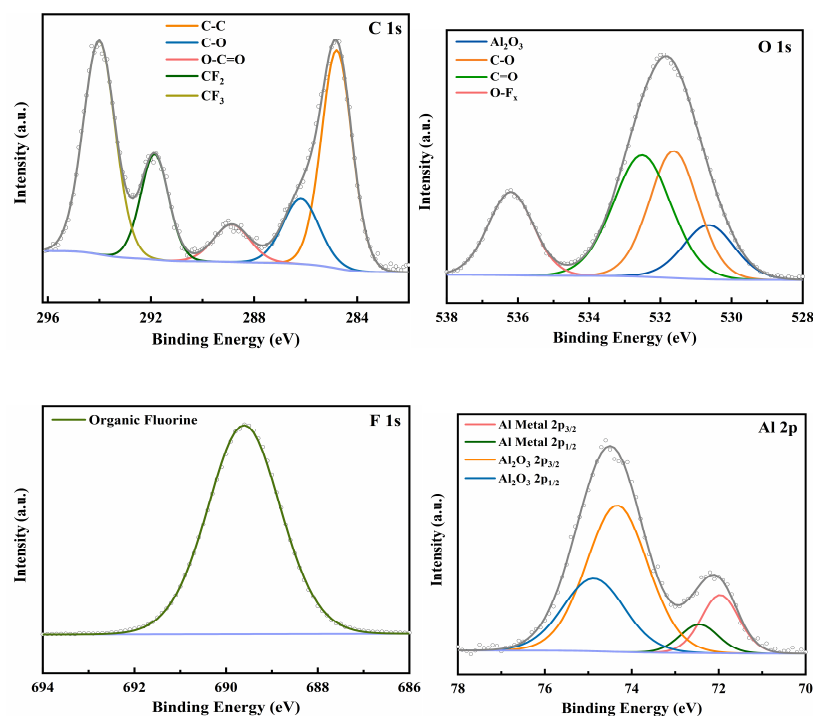

**Figure S6.** XPS spectra of C 1s peaks, O 1s peaks, O 1s peaks and Al 2p peaks for nAl@7.5%PFPE particles

**Table S1.** Weight percent of all components in each sample.

| Samples      | Al NPs (%) | PFPE (%) | 1,1,2-trichloro-1,2,2-trifluoroethane (CFC-113)  |
|--------------|------------|----------|--------------------------------------------------|
| nAl@2.5%PFPE | 97.5       | 2.5      | 1g Al NPs and PFPE suspended in 60 mL of CFC-113 |
| nAl@5.0%PFPE | 95.0       | 5.0      |                                                  |
| nAl@7.5%PFPE | 92.5       | 7.5      |                                                  |

**Table S2.** Characteristic parameters of PFPE-functionalized Al NPs at a heating rate of 5K·min<sup>-1</sup>.

| Samples      | $\Delta m_1$ (%) | $\Delta m_2$ (%) | $\Delta m_3$ (%) | $T_{p1}$ (°C) | $T_{p2}$ (°C) | $T_{p3}$ (°C) |
|--------------|------------------|------------------|------------------|---------------|---------------|---------------|
| nAl@2.5%PFPE | -6.08            | 27.32            | 36.58            | 316.3         | 592.2         | 796.4         |
| nAl@5.0%PFPE | -9.01            | 24.24            | 32.72            | 319.3         | 594.8         | 798.3         |
| nAl@7.5%PFPE | -15.62           | 23.66            | 31.66            | 322.6         | 595.4         | 799.1         |

**Table S3.** Physical properties of Al and Al<sub>2</sub>O<sub>3</sub>

| Physical properties                                           | Al                  | Al <sub>2</sub> O <sub>3</sub> |
|---------------------------------------------------------------|---------------------|--------------------------------|
| Molar mass (g·mol <sup>-1</sup> )                             | 26.98               | 101.96                         |
| Density (kg·m <sup>-3</sup> )                                 | 2700                | 4000                           |
| Melting point (K)                                             | 933                 | 2327                           |
| Boiling point (K)                                             | 2740                | 3373                           |
| Specific heat capacity (J·kg <sup>-1</sup> ·K <sup>-1</sup> ) | 938                 | 880                            |
| Thermal conductivity (W·m <sup>-1</sup> ·K <sup>-1</sup> )    | 210                 | 18                             |
| Thermal expansion coefficient (K <sup>-1</sup> )              | 23×10 <sup>-6</sup> | 8.6×10 <sup>-6</sup>           |
| Shear modulus (GPa)                                           | 26                  | 124                            |
| Elastic modulus (GPa)                                         | 70-79               | 300                            |
| Bulk modulus (GPa)                                            | 76                  | 165                            |
